# Supplementary material for: EPIMIC: A Simple Homemade Computer Program for Real-Time EPIdemiological Surveillance and Alert Based on MICrobiological Data
Source: PLoS One. 2015 Dec 14;10(12):e0144178. doi: 10.1371/journal.pone.0144178 (PMC4682850; doi:10.1371/journal.pone.0144178)
Supplement: S2 Table — (XLSX) [file pone.0144178.s002.xlsx]

## Sheet: Comparative_table
Type of pathogen	Pathogens	Country	Date of implementation or duration	Type of surveillance	Related articles
Bacteria	S. pneumoniae, H. influenzae and N. meningitidis	19 Latin American countries	1993	Retrospective	Castañeda E. et al. Laboratory-based surveillance of Streptococcus pneumoniae invasive disease in children in 10 Latin American countries: a SIREVA II project, 2000-2005. Pediatr Infect Dis J. (2009), 28(9):e265-70.	Ibarz-Pavón AB. et al. Laboratory-based surveillance of Neisseria meningitidis isolates from disease cases in Latin American and Caribbean countries, SIREVA II 2006-2010. PLoS One. (2012),7(8):e44102.
	N. meningitidis	Austria	1995	Not precised	Steindl G. et al. Epidemiology of invasive meningococcal disease in Austria 2010. Wien Klin Wochenschr. (2011), 123 Suppl 1:10-4.
	M. tuberculosis	Brazil	From 1998 to 2007	Not precised	Gomes T. et al. Extrapulmonary tuberculosis: Mycobacterium tuberculosis strains and host risk factors in a large urban setting in Brazil. PLoS One. (2013), 8(10):e74517.
	M. tuberculosis	Cambodia	From March 2003 to February 2005	Real-time	Sar B. et al. Anti-tuberculosis drug resistance and HIV co-infection in Phnom Penh, Cambodia. Southeast Asian J Trop Med Public Health. (2009), 40(1):104-7.
	Salmonella spp.	China	Not precised	Real-time	Dong BQ. et al. Trends and disease burden of enteric fever in Guangxi province, China, 1994-2004. Bull World Health Organ. (2010), 88(9):689-96.
	M. tuberculosis	China	From November 2004 to April 2007	Real-time	Deng Y. et al. Laboratory-based surveillance of extensively drug-resistant tuberculosis, China. Emerg Infect Dis. (2011), 17(3):495-7.
	Invasive meningococcal disease	China	From 2000 to 2010	Real-time	Xu XH. Et al. Emergence of serogroup C meningococcal disease associated with a high mortality rate in Hefei, China. BMC Infect Dis. (2012), 12:205.
	E.coli O157:H7, V. cholerae, Salmonella typhi and paratyphi, Shigella, Y. enterocolitica, C. jejuni, L. monocytogenes, and other bacteria pathogens including N. meningitidis, Y. pestis, L. interrogans, and S. suis.	China	2004	Real-time	Li W. et al. PulseNet China, a model for future laboratory-based bacterial infectious disease surveillance in China. Front Med. (2012), 6(4):366-75.
	Beta-haemolytic streptococci	Denmark	From 2005 to 2011	Real-time	Lambertsen LM. Et al. Nationwide laboratory based surveillance of invasive beta-haemolytic streptococci in Denmark from 2005 to 2011. Clin Microbiol Infect. (2013).
	N. gonorrhoeae	Europe	2004	Retrospective	Cole MJ. et al. The European gonococcal antimicrobial surveillance programme, 2009. Euro Surveill. (2011), 16(42).
	C. difficile	Finland	January 2008	Retrospective	Kotila SM. et al. Incidence, case fatality and genotypes causing Clostridium difficile infections, Finland, 2008. Clin Microbiol Infect. (2011), 17(6):888-93.	Kanerva M. et al. Reduction in Clostridium difficile infections in Finland, 2008-2010. J Hosp Infect. (2013), 83(2):127-31.
	M. pneumoniae	Finland	1995	Retrospective	Polkowska A. et al. Increased incidence of Mycoplasma pneumoniae infection in Finland, 2010-2011. Euro Surveill. (2012), 17(5).
	Invasive pneumococcal disease	Germany	From 2003 to 2007	Retrospective	Imöhl M. et al. Adult invasive pneumococcal disease between 2003 and 2006 in North-Rhine Westphalia, Germany: serotype distribution before recommendation for general pneumococcal conjugate vaccination for children <2 years of age. Clin Microbiol Infect. (2009), 15(11):1008-12.	Imöhl M. et al. Epidemiology of invasive Streptococcus pyogenes disease in Germany during 2003-2007. FEMS Immunol Med Microbiol. (2010), 58(3):389-96.
	Antimicrobial resistance for 13 bacterial species	Germany	February 2000	Retrospective	Meyer E. et al. Dramatic increase of third-generation cephalosporin-resistant E. coli in German intensive care units: secular trends in antibiotic drug use and bacterial resistance, 2001 to 2008. Crit Care. (2010), 14(3):R113.
	Shiga toxin/verotoxin-producing Escherichia coli	Germany	May 25 2011	Retrospective	Wadl M. et al. Enhanced surveillance during a large outbreak of bloody diarrhoea and haemolytic uraemic syndrome caused by Shiga toxin/verotoxin-producing Escherichia coli in Germany, May to June 2011. Euro Surveill. (2011), 16(24).
	K. pneumoniae (others not precised)	Italy	2008	Retrospective	Sisto A. et al. Carbapenem non-susceptible Klebsiella pneumoniae from Micronet network hospitals, Italy, 2009 to 2012. Euro Surveill. (2012), 17(33).
	Invasive listeriosis	Italy	2005	Retrospective	Mammina C. et al. Enhanced surveillance of invasive listeriosis in the Lombardy region, Italy, in the years 2006-2010 reveals major clones and an increase in serotype 1/2a. BMC Infect Dis. (2013), 13:152.
	V. cholerae	Nepal	From June 2008 to January 2009	Not precised	Karki R. et al. Cholera incidence among patients with diarrhea visiting National Public Health Laboratory, Nepal. Jpn J Infect Dis. (2010), 63(3):185-7.
	H. influenza, N. meningitidis and S. pneumoniae	Netherlands	1975	Not precised	van Wessel K. et al. Nontypeable Haemophilus influenzae invasive disease in The Netherlands: a retrospective surveillance study 2001-2008. Clin Infect Dis. (2011), 53(1):e1-7.
	S. pneumoniae, H. influenzae, M. catarrhalis and S. pyogenes	Portugal	1999	Not precised	Melo-Cristino J. et al. The Viriato study: update on antimicrobial resistance of microbial pathogens responsible for community-acquired respiratory tract infections in Portugal. Paediatr Drugs. (2010), 12 Suppl 1:11-7.
	S. agalactiae	South Africa	From January 2004 to December 2008	Prospective	Madzivhandila M. et al. Serotype distribution and invasive potential of group B streptococcus isolates causing disease in infants and colonizing maternal-newborn dyads. PLoS One. (2011), 6(3):e17861.
	M. tuberculosis	South Africa	From the January 2004 to December 2006	Prospective	Wiseman CA. et al. Bacteriologically confirmed tuberculosis in HIV-infected infants: disease spectrum and survival. Int J Tuberc Lung Dis. (2011), 15(6):770-5.
	Invasive pneumococcal disease	Spain	From May 2007 to April 2008	Retrospective	Picazo J. et al. Clonal and clinical profile of Streptococcus pneumoniae serotype 19A causing pediatric invasive infections: a 2-year (2007-2009) laboratory-based surveillance in Madrid. Vaccine. (2011), 29(9):1770-6.
	S. pneumoniae	Spain	From January 1997 to June 2009	Retrospective	Fenoll A. et al. Increase in serotype 19A prevalence and amoxicillin non-susceptibility among paediatric Streptococcus pneumoniae isolates from middle ear fluid in a passive laboratory-based surveillance in Spain, 1997-2009. BMC Infect Dis. (2011), 11:239.
	Bacterial meningitidis	Sudan	From 2004 to 2005	Retrospective	Afifi S. et al. Laboratory-based surveillance for patients with acute meningitis in Sudan, 2004-2005. Eur J Clin Microbiol Infect Dis. (2009), 28(5):429-35.
	M. tuberculosis	Taiwan	June 14 2005	Real-time	Chen TC. et al. Computer laboratory notification system via short message service to reduce health care delays in management of tuberculosis in Taiwan. Am J Infect Control. (2011), 39(5):426-30.
	W. bancrofti	Togo	2006	Not precised	Mathieu E. et al. A laboratory-based surveillance system for Wuchereria bancrofti in Togo: a practical model for resource-poor settings. Am J Trop Med Hyg. (2011), 84(6):988-93.
	S. aureus	USA	From January 2005 to June 2008	Not precised	Mongkolrattanothai K. et al. Epidemiology of community-onset Staphylococcus aureus infections in pediatric patients: an experience at a Children's Hospital in central Illinois. BMC Infect Dis. (2009), 9:112.
	Antimicrobial resistance for enteric bacteria	USA	1999	Not precised	Lynch MF. et al. Typhoid fever in the United States, 1999-2006. JAMA. (2009), 302(8):859-65.
	S. pneumoniae, group A and group B Streptococcus, N. meningitidis, and H. influenzae	USA	1995	Not precised	Rosen JB. et al. Geographic variation in invasive pneumococcal disease following pneumococcal conjugate vaccine introduction in the United States. Clin Infect Dis. (2011), 53(2):137-43.
	Lyme disease	USA	1996	Not precised	Ertel SH. et al. Effect of surveillance method on reported characteristics of Lyme disease, Connecticut, 1996-2007. Emerg Infect Dis. (2012), 18(2):242-7.
	Gram-positive rods	USA	2003	Not precised	Begier EM. et al. Gram-positive rod surveillance for early anthrax detection. Emerg Infect Dis. (2005), 11(9):1483-6.
	Mycobacterium tuberculosis	USA	1953	Not precised	Vinnard C. et al. Isoniazid resistance and death in patients with tuberculous meningitis: retrospective cohort study. BMJ. (2010), 341:c4451.	http://www.cdc.gov/tb/
	Non-Typhi Salmonella isolate, Salmonella Typhi, Shigella isolate, and E. coli O157 and Campylobacter	USA	1996	Not precised	Crump JA. et al. Antimicrobial resistance among invasive nontyphoidal Salmonella enterica isolates in the United States: National Antimicrobial Resistance Monitoring System, 1996 to 2007. Antimicrob Agents Chemother. (2011), 55(3):1148-54.	http://www.cdc.gov/narms/
Undefined	Various infectious diseases	Belgium	1983	Retrospective	Hanquet G. et al. Impact of rotavirus vaccination on laboratory confirmed cases in Belgium. Vaccine. (2011), 29(29-30):4698-703.
	Nosocomial infections	Canada	1995	Retrospective	Simor AE. et al. Methicillin-resistant Staphylococcus aureus colonization or infection in Canada: National Surveillance and Changing Epidemiology, 1995-2007. Infect Control Hosp Epidemiol. (2010), 31(4):348-56.	http://publications.gc.ca/collections/collection_2012/aspc-phac/HP40-61-2011-eng.pdf
	Various infectious diseases	England	Not precised	Real-time surveillance	Severi E. et al. Infectious disease surveillance for the London 2012 Olympic and Paralympic Games. Euro Surveill. (2012), 17(31).
	All pathogens	England and Wales	From July 1996 to June 2006	Real-time surveillance	Trotter CL. et al. Epidemiology of invasive pneumococcal disease in the pre-conjugate vaccine era: England and Wales, 1996-2006. J Infect. (2010), 60(3):200-8.	Enki DG. et al. Automated biosurveillance data from England and Wales, 1991-2011. Emerg Infect Dis. (2013), 19(1):35-42.
	Both bacteria and fungus species isolated from blood	Finland	Not precised	Retrospective	Poikonen E. et al. Secular trend in candidemia and the use of fluconazole in Finland, 2004-2007. BMC Infect Dis. (2010), 10:312.
	Antimicrobial resistance for all clinical pathogens and sample types	Germany	From 2008 to 2010	Retrospective	Schweickert B. et al. MRSA-surveillance in Germany: data from the Antibiotic Resistance Surveillance System (ARS) and the mandatory surveillance of MRSA in blood. Eur J Clin Microbiol Infect Dis. (2012), 31(8):1855-65.
	Varicella-associated invasive group A streptococcus infections	Germany	January 1996	Not precised	Imöhl M. et al. Invasive group A streptococcal disease and association with varicella in Germany, 1996-2009. FEMS Immunol Med Microbiol. (2011), 62(1):101-9.
	23 alerts defined	Italy	From May 2006 to Septembre 2008	Retrospective	Passerini R. et al. Laboratory-based management of microbiological alerts: effects of an automated system on the surveillance and treatment of nosocomial infections in an oncology hospital. Ecancermedicalscience. (2009), 3:137.
	Healthcare-associated infections	Italy	From January 2007 to May 2010	Retrospective	Ansaldi F. et al. Sequential outbreaks of multidrug-resistant Acinetobacter baumannii in intensive care units of a tertiary referral hospital in Italy: combined molecular approach for epidemiological investigation. J Hosp Infect. (2011), 79(2):134-40.
	Foodborne diseases (mainly Salmonella spp.)	Jordan, the Palestinian authority and Israel	July 2005	Not precised	Cohen D. et al. A Middle East subregional laboratory-based surveillance network on foodborne diseases established by Jordan, Israel, and the Palestinian Authority. Epidemiol Infect. (2010), 138(10):1443-8.
	Haemophilus influenzae type b, meningococcal and pneumococcal diseases, and HIV	South Africa	July 1999	Prospective	Wolter N. et al. Molecular characterization of emerging non-levofloxacin-susceptible pneumococci isolated from children in South Africa. J Clin Microbiol. (2009), 47(5):1319-24.	Mothibeli KM. et al. An unusual pneumococcal sequence type is the predominant cause of serotype 3 invasive disease in South Africa. J Clin Microbiol. (2010), 48(1):184-91.	Moodley C. et al. Clonal analysis of Neisseria meningitidis serogroup B strains in South Africa, 2002 to 2006: emergence of new clone ST-4240/6688. J Clin Microbiol. (2012), 50(11):3678-86.	von Gottberg A. et al. Epidemiology of invasive pneumococcal disease in the pre-conjugate vaccine era: South Africa, 2003-2008. Vaccine. (2013), 31(38):4200-8.	Keddy KH. et al. Systemic shigellosis in South Africa. Clin Infect Dis. (2012), 54(10):1448-54.
	Nosocomial infections	Spain	2006	Retrospective	Almirante B. et al. Laboratory-based surveillance of hospital-acquired catheter-related bloodstream infections in Catalonia. Results of the VINCat Program (2007-2010). Enferm Infecc Microbiol Clin. (2012), 30 Suppl 3:13-9.
	Antimicrobial resistance and consumption	Switzerland	Not precised	Not precised	Kronenberg A. et al. Temporal trends of extended-spectrum cephalosporin-resistant Escherichia coli and Klebsiella pneumoniae isolates in in- and outpatients in Switzerland, 2004 to 2011. Euro Surveill. (2013), 18(21).	http://www.anresis.ch/en/index.html
	Nosocomial infections	Turkey	From January 2008 to December 2011	Retrospective	Tekin R. et al. A 4-year surveillance of device-associated nosocomial infections in a neonatal intensive care unit. Pediatr Neonatol. (2013), 54(5):303-8.
	Various infectious diseases	USA	2004	Not precised	Castillo-Salgado C. Trends and directions of global public health surveillance. Epidemiol Rev. (2010), 32(1):93-109.	http://www.usda.gov/oig/webdocs/24601-6-AT.pdf
	Respiratory infections, Febrile and vector-borne infections, Gastrointestinal infections, Antimicrobial resistant organisms and Sexually-transmitted infections	Worldwide	1997	Real-time	Fukuda MM. et al. Malaria and other vector-borne infection surveillance in the U.S. Department of Defense Armed Forces Health Surveillance Center-Global Emerging Infections Surveillance program: review of 2009 accomplishments. BMC Public Health. (2011), 11 Suppl 2:S9.	http://www.afhsc.mil/geis
	Any targeted disease tested	Canada	2009	Retrospective	Mukhi SN. et al. DIAL: A Platform for real-time Laboratory Surveillance. Online J Public Health Inform. (2010), 2(3).
Parasite	Congenital toxoplasmosis	France	June 2007	Real-time	Villena I. Congenital toxoplasmosis in France in 2007: first results from a national surveillance system. Euro Surveill. (2010), 15(25).
	Cryptosporidiosis	France	2004	Real-time	ANOFEL Cryptosporidium National Network. Laboratory-based surveillance for Cryptosporidium in France, 2006-2009. Euro Surveill. (2010), 15(33):19642.
Virus	HIV	France	2001	Real-time	Héraud-Bousquet V. et al. A three-source capture-recapture estimate of the number of new HIV diagnoses in children in France from 2003-2006 with multiple imputation of a variable of heterogeneous catchability. BMC Infect Dis. (2012), 12:251.	http://www.invs.sante.fr/publications/2005/snmi/pdf/vih_labo.pdf
	Influenza viruses	Italy	Not precised	Retrospective	Surveillance Group for New Influenza A(H1N1) Virus Investigation in Italy. Virological surveillance of human cases of influenza A(H1N1)v virus in Italy: preliminary results. Euro Surveill. (2009), 14(24).
	Dengue virus	Mayotte	2007	Not precised	Lernout T. et al. Emergence of dengue virus serotype 3 on Mayotte Island, Indian Ocean. East Afr J Public Health. (2011), 8(2):155-6.
	Dengue virus	Puerto Rico	More than 30 years	Real-time	Muñoz-Jordán JL. et al. Highly sensitive detection of dengue virus nucleic acid in samples from clinically ill patients. J Clin Microbiol. (2009), 47(4):927-31.	http://www.cdc.gov/Dengue/about/InPuerto.html
	Dengue virus	Singapore	2005	Not precised	Lee KS. et al. Dengue virus surveillance for early warning, Singapore. Emerg Infect Dis. (2010), 16(5):847-9.
	Measles viruse	South Korea	2006	Not precised	Choe YJ. et al. Current status of measles in the Republic of Korea: an overview of case-based and seroepidemiological surveillance scheme. Korean J Pediatr. (2012), 55(12):455-61.
	Enterovirus	USA	From 2006 to 2008	Not precised	Centers for Disease Control and Prevention (CDC). Nonpolio enterovirus and human parechovirus surveillance --- United States, 2006-2008. MMWR Morb Mortal Wkly Rep. (2010), 59(48):1577-80.
	HEV	USA	From 2005 to 2012	Not precised	Drobeniuc J. et al. Laboratory-based surveillance for hepatitis E virus infection, United States, 2005-2012. Emerg Infect Dis. (2013), 19(2):218-22.
	H1N1 influenza virus	USA	Not precised	Not precised	Balter S. et al. Pandemic (H1N1) 2009 surveillance for severe illness and response, New York, New York, USA, April-July 2009. Emerg Infect Dis. (2010), 16(8):1259-64.
	Influenza viruses	Worldwide	1995	Real-time	Castillo-Salgado C. Trends and directions of global public health surveillance. Epidemiol Rev. (2010), 32(1):93-109.	http://www.who.int/influenza/gisrs_laboratory/flunet/en/
	Dengue	Worldwide	1995	Real-time	Castillo-Salgado C. Trends and directions of global public health surveillance. Epidemiol Rev. (2010), 32(1):93-109.	http://www.who.int/csr/disease/dengue/denguenet/en/
	Rabies	Worldwide	End of 1990s	Real-time	Castillo-Salgado C. Trends and directions of global public health surveillance. Epidemiol Rev. (2010), 32(1):93-109.	Weekly epidemiological record Relevé épidémiologique hebdomadaire 18 FEBRUARY 2005, 80th YEAR / 18 FÉVRIER 2005, 80e ANNÉE	http://www.who.int/rabies/rabnet/en/
	Avian influenza viruses	Worldwide	2006	Real-time	Castillo-Salgado C. Trends and directions of global public health surveillance. Epidemiol Rev. (2010), 32(1):93-109.	http://avianarchive.gains.org/
	Influenza viruses	Canada	1998	Retrospective	Schanzer DL. et al. The geographic synchrony of seasonal influenza: a waves across Canada and the United States. PLoS One. (2011), 6(6):e21471.	http://www.phac-aspc.gc.ca/fluwatch/
Yeast	Yeasts species	Argentina	From June 2007 to June 2008	Prospective	Córdoba S. et al. Species distribution and susceptibility profile of yeasts isolated from blood cultures: results of a multicenter active laboratory-based surveillance study in Argentina. Rev Argent Microbiol. (2011), 43(3):176-85.				2
	Candidemia	Brazil	From March 2003 to December 2007	Not precised	Bergamasco MD. et al. Epidemiology of candidemia in patients with hematologic malignancies and solid tumours in Brazil. Mycoses. (2013), 56(3):256-63.
	Yeasts species	China	From August 2009 to July 2010	Real-time	Wang H. et al. In vitro susceptibilities of yeast species to fluconazole and voriconazole as determined by the 2010 National China Hospital Invasive Fungal Surveillance Net (CHIF-NET) study. J Clin Microbiol. (2012), 50(12):3952-9.
	Candida spp.	India	From April 2008 to December 2009	Real-time surveillance	Singh RI. et al. Epidemiology of candidaemia in critically ill trauma patients: experiences of a level I trauma centre in North India. J Med Microbiol. (2011), 60(Pt 3):342-8.
	Candida spp.	Italy	From January to December 2009	Retrospective	Tortorano AM. et al. A 1-year prospective survey of candidemia in Italy and changing epidemiology over one decade. Infection. (2013), 41(3):655-62.
	Cryptococcal disease	South Africa	From January 2005 to 31 December 2007	Prospective	Meiring ST. et al. A comparison of cases of paediatric-onset and adult-onset cryptococcosis detected through population-based surveillance, 2005-2007. AIDS. (2012), 26(18):2307-14.
	Candida spp.	Spain	From Octobre 2005 to Septembre 2006	Retrospective	Flórez C. et al. In vitro susceptibilities of bloodstream isolates of Candida spp.: results from a multicenter active surveillance program in Andalusia. Enferm Infecc Microbiol Clin. (2009), 27(9):518-22.
	Candida spp.	Spain	From June 2008 to June 2009	Retrospective	Cisterna R. et al. Nationwide sentinel surveillance of bloodstream Candida infections in 40 tertiary care hospitals in Spain. J Clin Microbiol. (2010), 48(11):4200-6.
	Candida spp.	Australia	1999	Retrospective	Playford EG. et al. Increasing incidence of candidaemia: long-term epidemiological trends, Queensland, Australia, 1999-2008. J Hosp Infect. (2010), 76(1):46-51.
